# Supplementary material
Source: Elsevier journal article supplement (https://repository.kaust.edu.sa/bitstream/handle/10754/581473/mmc1.doc)
Supplement: mmc1 [file mmc1.doc]

Text S1. Analytical methods.

Four Trihalomethanes (THMs), four haloacetonitriles (HANs), two haloketones (HKs) and chloropicrin were analyzed after liquid-liquid extraction following EPA method 551. 20 mL of sample was transferred to a 40mL glass vial containing 4 g of anhydrous sodium chloride. 100 μL of decafluorobiophenyl was added as the internal standard. DBPs were extracted with 3 mL of MTBE. 1μL of solvent was injected (temperature: 200°C) in splitless mode (1mL/min) in an Agilent 7890A gas chromatograph coupled with electron capture detector (GC-ECD). DBPs were separated onto a DB-1701 (30 m x 250 μm x 0.25 μm) column. The column oven was held at 35oC for 6 min, ramping to 220 °C at 10 °C/min. The total run time was 24.5 min.

Nine HAAs were extracted and analyzed following the EPA method 552.2, based on a liquid-liquid extraction with MTBE in acidic condition followed by derivatization to methyl esters using acidic methanol. 20mL of sample was transferred to a 40mL glass vial containing 4 g of anhydrous sodium chloride. Concentrated sulfuric acid (0.8 mL) was added to adjust the sample pH to acidic condition. After addition of 50 μL of 2-bromopropionic acid as internal standard DBPs were extracted with 4 mL of MTBE. The MTBE layer was transferred to a 10 mL glass vial containing 1 mL of acidic methanol (10 % of sulfuric acid in methanol). The vial was placed in a heating bath at 50 °C. After 2 h, saturated NaHCO3 (4 mL) was slowly added to the vial for neutralization. The vial was shacked for 2 min, and then MTBE layer was subsequently transferred to an autosampler vial. The extract was analyzed using an Agilent 7890A GC system coupled with a 5975C mass spectrometer (GC-MS). The instrument control parameters (i.e., temperature program, column type, injection volume and run time) of GC-MS were the same as those on GC-ECD.

HAcAms were analyzed following the same protocol as HANs, but MTBE was replaced by ethyl acetate for the liquid-liquid extraction.

Average method detection limits for HANs, HKs, TCNM, THMs, HAAs, and HAcAms were 0.13 µg/L, 0.08 µg/L, 0.12 µg/L, 0.02 µg/L, 0.02 µg/L and 0.40 µg/L respectively, based on the standard deviation of 3 replicates.

Text S2. Details of integration of equations.

14N-DBP precursors + NH2Cl → 14N-DBP

Let [A] = [14NDBP precursors], [B] = [NH2Cl] and *x* be the concentration of each species reacted at time *t*. In our conditions, initial concentrations of the two reactants are different, i.e., [A]0 ≠ [B]0.

Then [A] = [A]0 – *x* and [B] = [B]0 – *x*

Thus:

or

Integrating between *t =* 0(when *x =* 0) and t gives:

Using the method of partial fractions:

We obtain:

Evaluating the integral gives:

Which simplifies to:

Finally:

Table S1. Description of monitored labeled- and unlabeled-DBPs and their quantification ions

| Class of compound | Abbreviation | Quantification ions (m/z) |
| --- | --- | --- |
| Haloacetonitriles (HANs) | 14N-DCAN  15N-DCAN | 74, 82  75, 82 |
| 14N-TCAN  15N-TCAN | 47, 108, 110  47, 109, 111 |
| 14N-BCAN  15N-BCAN | 74, 76, 155  75, 77, 156 |
| 14N-DBAN  15N-DBAN | 118, 120, 199  119, 121, 200 |
| Haloacetamides (HAcAms) | 14N-CAcAm  15N-CAcAm | 44, 93, 95  45, 94, 96 |
|  | 14N-BAcAm  15N-BAcAm | 44, 137, 139  45, 138, 140 |
| 14N-DCAcAm  15N-DCAcAm | 44, 83, 127  45, 83, 128 |
| 14N-TCAcAm  15N-TCAcAm | 44, 82, 98  45, 82, 98 |
| 14N-DBAcAm  15N-DBAcAm | 44, 174, 217  45, 174, 218 |
| 14N-BCAcAm  15N-BCAcAm | 44, 171, 173  45, 172, 174 |

Table S2. Sources and Characteristics of DOM isolates

| DOM source | Fractiona | Abbreviation | Mass ratio | | | SUVA254b  (L mg-1 m-1) |
| --- | --- | --- | --- | --- | --- | --- |
| %C | %N | C/N ratio |  |
| Suwannee River c | HPOA | SR HPOA | 48.0 | 0.7 | 68.6 | 4.6 |
| Blavet River | HPO | BR HPO | 46.9 | 1.9 | 24.7 | 4.3 |
| Gartempe River | HPO | GR HPO | 46.9 | 2.1 | 22.3 | 4.0 |
| Ribou River | HPI | RR HPI | 35.2 | 4.5 | 7.8 | 1.2 |
| Jeddah Wastewater Effluent | HPO | JW HPO | 56.6 | 2.9 | 19.5 | 2.9 |
| Jeddah Wastewater Effluent | TPI | JW TPI | 50.2 | 6.0 | 8.4 | 1.9 |
| Jeddah Wastewater Effluent | Colloids | JW COL | 43.1 | 6.6 | 6.5 | 1.1 |
| a HPOA: Hydrophobic acids; HPO: Hydrophobics; HPI: Hydrophilic acids; TPI: Transphilics.  b SUVA254: Specific ultraviolet absorbance was calculated from UV absorbance at 254 nm (UV254) divided by the corresponding DOC concentration (this study).  C (Croue et al., 2000) | | | | | | |

Croue, J.-P., Korshin, G.V., Benjamin, M.M., 2000. Characterization of natural organic matter in drinking water. American Water Works Association, USA.

Table S3. DBP formation potentials by chloramination (15 mg Cl2/L) of DOM isolates (DOC = 5 mg C/L) at pH 8 during 72h of contact time.

|  | Concentration(nM) (SDa) | | | | | | | | | | | | | | | |
| --- | --- | --- | --- | --- | --- | --- | --- | --- | --- | --- | --- | --- | --- | --- | --- | --- |
| Isolate | DCANb | | DCAcAmb | | DCAA | | TCAA | | DCAcAl | | TCAcAl | | TCM | | 1,1‑DCP | |
| SR HPOA | 70.9 | (30.5) | 132.0 | (76.4) | 542.0 | (97.6) | 5.1 | (0.2) | 40.4 | (4.4) | 5.1 |  | 317.7 | (191.4) | 61.6 | (38.3) |
| BR HPO | 42.8 | (5.2) | 63.4 | (2.4) | 594.6 | (9.7) | 5.8 | (1.0) | 30.5 | (0.6) | 6.3 | (0.1) | 144.4 | (4.0) | 28.3 | (1.9) |
| GR HPO | 16.3 | (4.9) | 42.8 | (4.4) | 292.7 | (25.6) | 6.9 | (4.3) | 17.7 | (4.9) | 5.1 | (0.4) | 107.6 | (56.6) | 8.4 | (5.3) |
| RR HPI | 17.2 | (6.1) | 31.6 | (10.0) | 135.7 | (83.2) | 4.0 | (2.8) | 20.9 | (9.7) | 6.3 |  | 80.4 |  | N.D.c |  |
| JW HPO | 31.6 | (5.6) | 47.6 | (6.1) | 103.1 | (62.3) | N.D. | (2.9) | 28.5 | (7.0) | 7.7 |  | 17.2 |  | 20.6 |  |
| JW TPI | 23.1 | (6.1) | 50.8 | (7.6) | 197.3 | (130.6) | 6.5 | (3.5) | 33.9 | (12.6) | 7.3 |  | 158.8 |  | 26.7 |  |
| JW COL | 15.3 | (5.6) | 27.8 | (6.1) | 56.0 | (62.3) | N.D. | (2.9) | 14.8 | (7.0) | 6.8 |  | 32.9 | (12.1) | N.D. | (1.4) |
| a SD = standard deviation between duplicate experiments  b DCAN and DCAcAm concentrations are the sum of 14N and 15N concentrations  c N.D. = Not Detected | | | | | | | | | | | | | | | | |

Table S4. Coefficient of determination (R2) between SUVA and DBPs for groups of DOM isolates

|  | RW HPO | JW | RW + WW + RR HPI |
| --- | --- | --- | --- |
| 15N-DCAcAm | 0.924 | 0.923 | 0.582 |
| 15N-DCAN | 0.999 | 0.999 | 0.639 |
| 14N-DCAcAm | 0.857 | 0.078 | 0.083 |
| 14N-DCAN | 0.985 | 0.996 | 0.091 |
| TCM | 0.876 | 0.027 | 0.366 |
| DCP | 0.979 | 0.479 | 0.484 |
| TCNM | 0.952 | 0.004 | 0.012 |
| DCAcAl | 0.995 | 0.421 | 0.272 |
| TCAcAl | 0.001 | 0.996 | 0.348 |
| DCAA | 0.597 | 0.071 | 0.728 |
| TCAA | 0.975 | 0.004 | 0.223 |
| RW HPO = River water hydrophobic fractions (SR HPOA, GR HPO, BR HPO); JW = Jeddah wastewater effluent fractions (JW HPO, JW TPI, JW COL) | | | |

Figure S1. Formation pathways of DCAN and DCAcAm by chloramination of different organic precursors


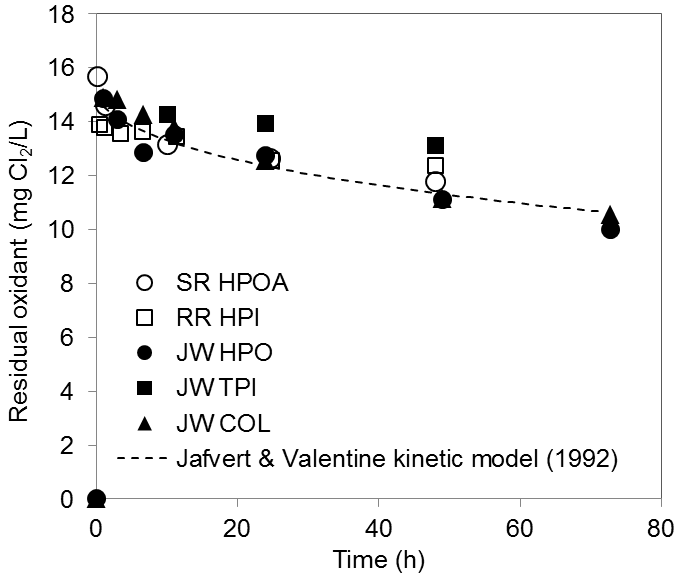


Figure S2. Residual oxidant measured during kinetic experiments from SR HPOA, RR HPI, JW HPO, JW TPI and JW COL isolates (5 mg C/L) and NH2Cl (15 mg CL2/L) at pH 8 (10 mM phosphate buffer) over 72h. Symbols are the experimental data and the dashed line represents the simulated residual oxidant following Jafvert and Valentine kinetic model (Jafvert and Valentine, 1992).

Jafvert, C.T., Valentine, R.L., 1992. Reaction scheme for the chlorination of ammoniacal water. Environ. Sci. Technol. 26, 577–786.

| 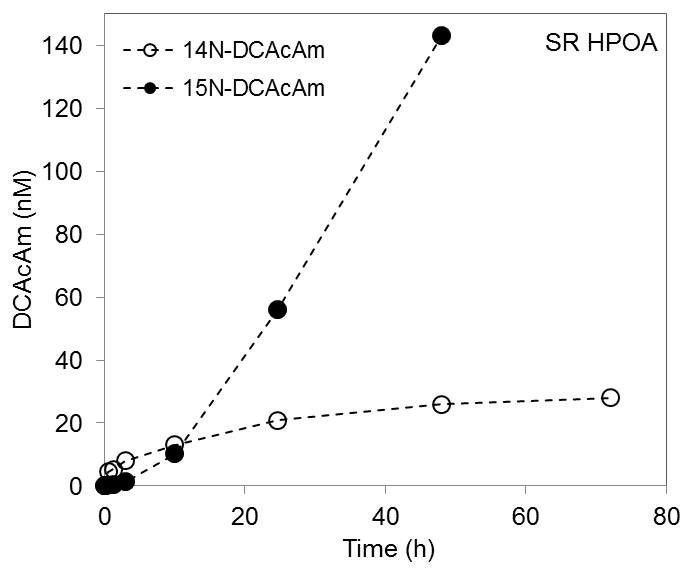 | 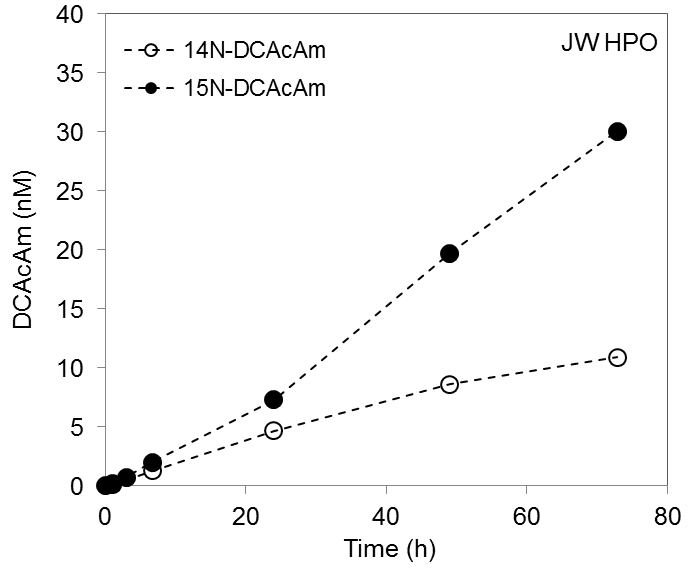 |
| --- | --- |
| 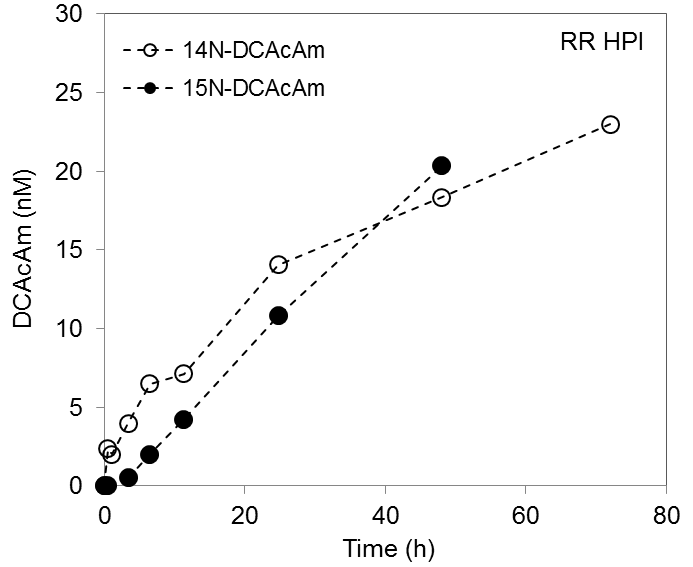 | 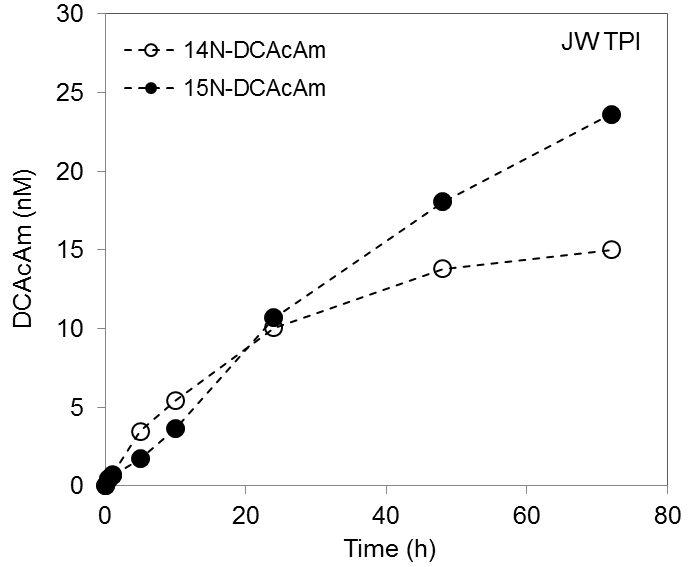 |
|  | 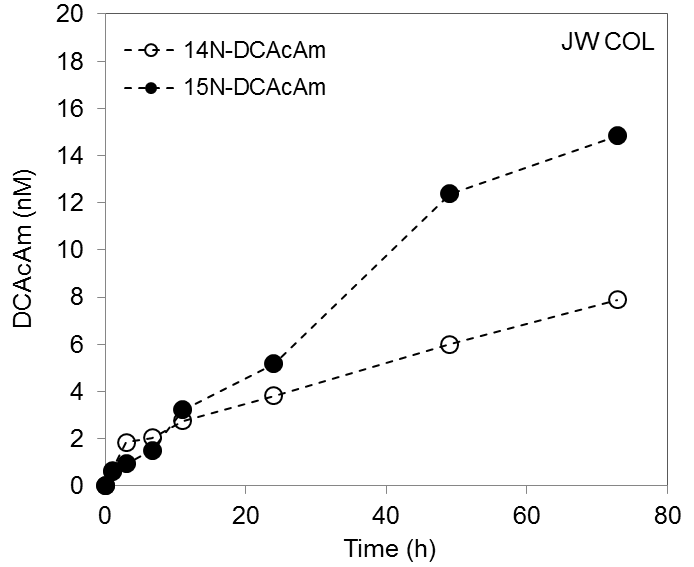 |

Figure S3. 14N-DCAcAm and 15N-DCAcAm formation from SR HPOA, RR HPI, JW HPO, JW TPI and JW COL isolates (5 mg C/L) and 15NH2Cl (15 mg Cl2/L) at pH 8 (10 mM phosphate buffer) over 72h.

| 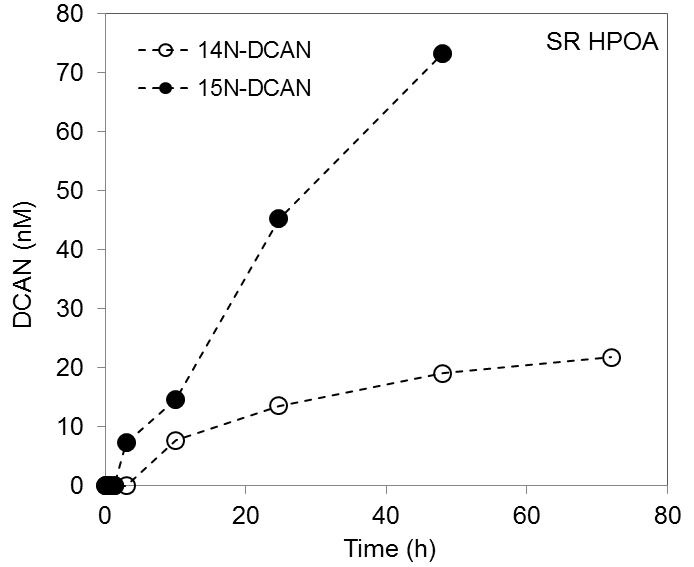 | 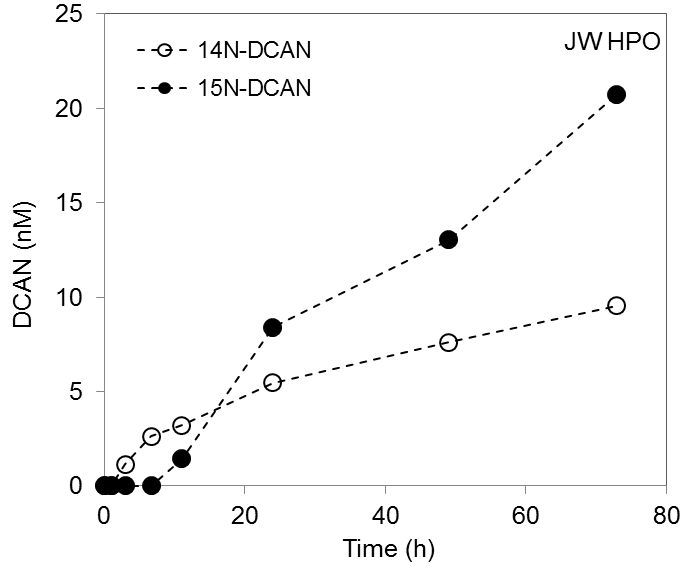 |
| --- | --- |
| 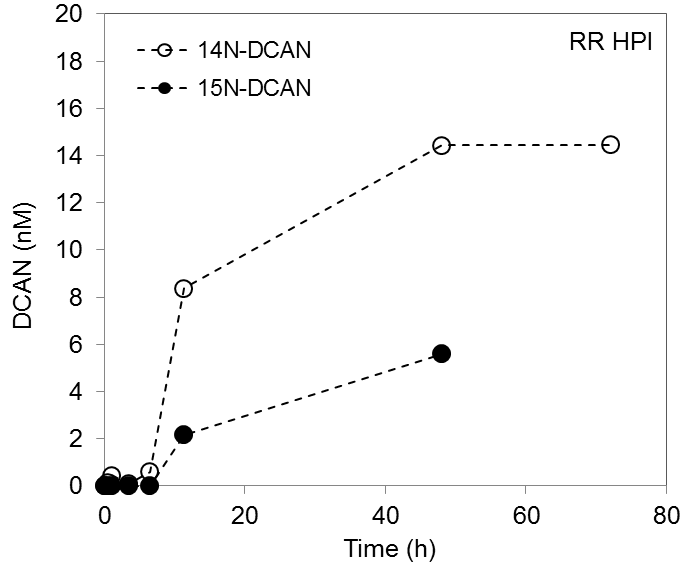 | 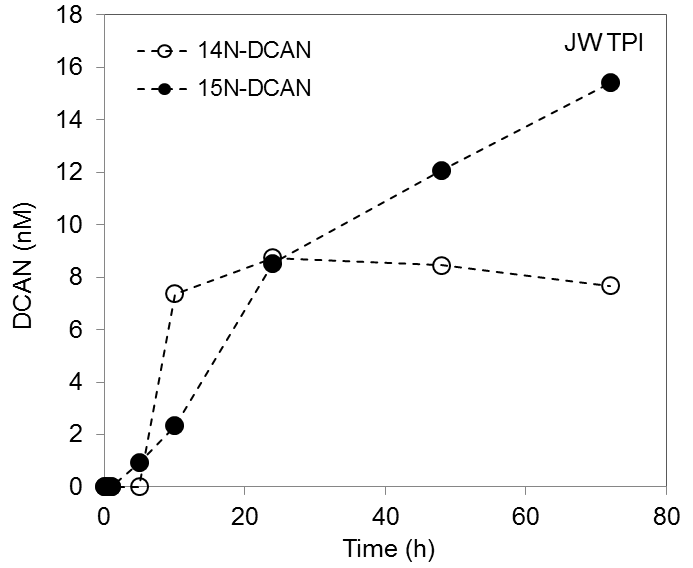 |
|  | 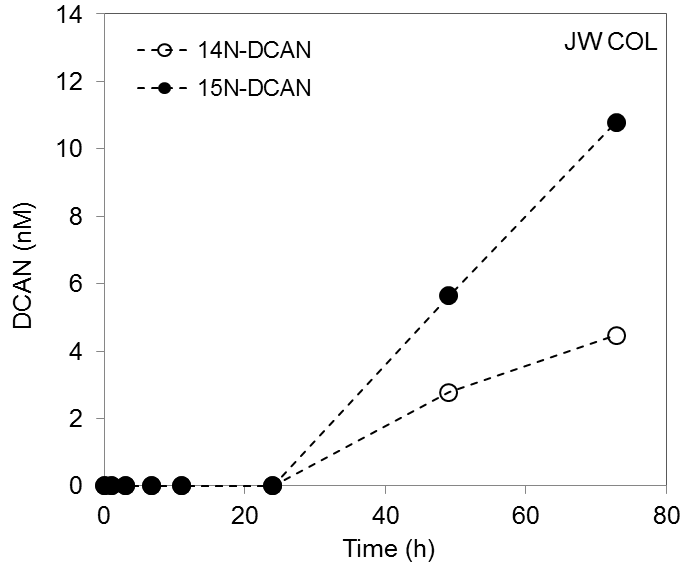 |

Figure S4. 14N-DCAN and 15N-DCAN formation from SR HPOA, RR HPI, JW HPO, JW TPI, and JW COL isolates (5 mg C/L) and 15NH2Cl (15 mg Cl2/L) at pH 8 (10 mM phosphate buffer) over 72h.


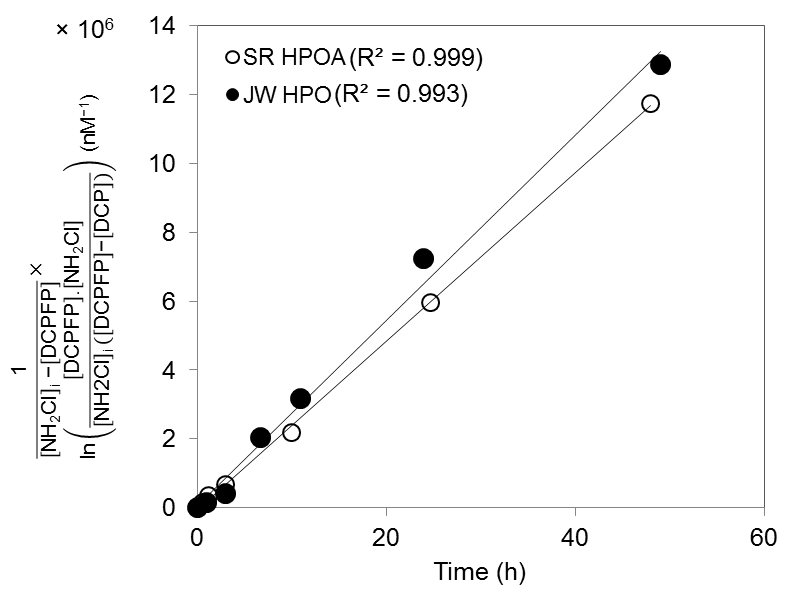


Figure S5. Second-order linear relationships for the formation of 1,1‑DCP during chloramination (15 mg Cl2/L) of SR HPOA and JW HPO (5 mg C/L) isolates at pH 8 (10 mM phosphate buffer).


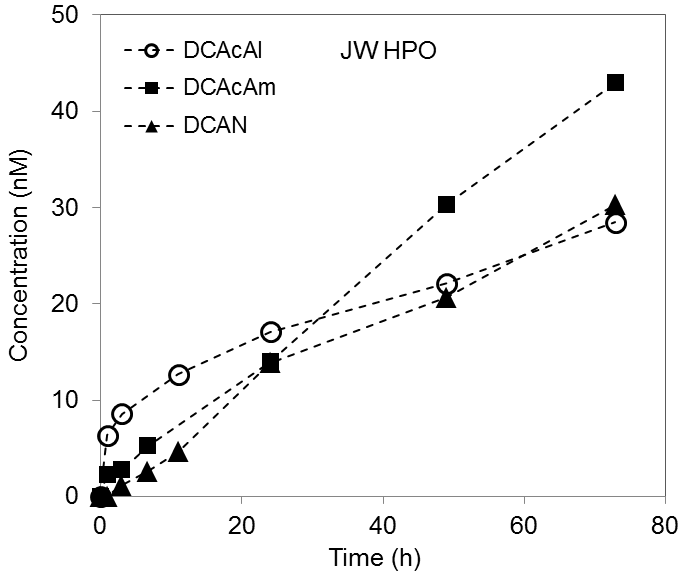

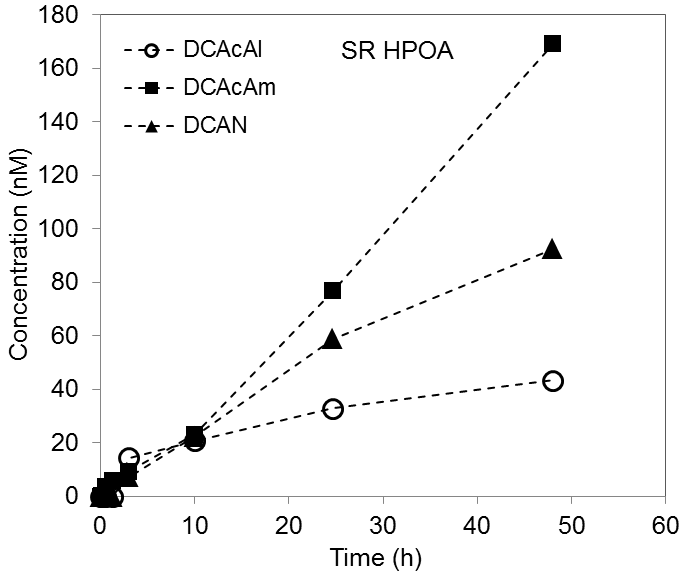


Figure S6. Formation of DCAcAl compared with DCAcAm and DCAN formation from JW HPO and SR HPOA isolates (5 mg C/L) and 15NH2Cl (15 mg Cl2/L) at pH 8 (10 mM phosphate buffer) over 72h.

|  |  |
| --- | --- |
|  |  |
|  |  |

Figure S7. Correlations between DCAA and DCAcAm formation during kinetics experiments of chloramination (15 mg Cl2/L) of SR HPOA, RR HPI, JW HPO, JW TPI, and JW COL isolates (5 mg C/L at pH 8 (10 mM phosphate buffer).


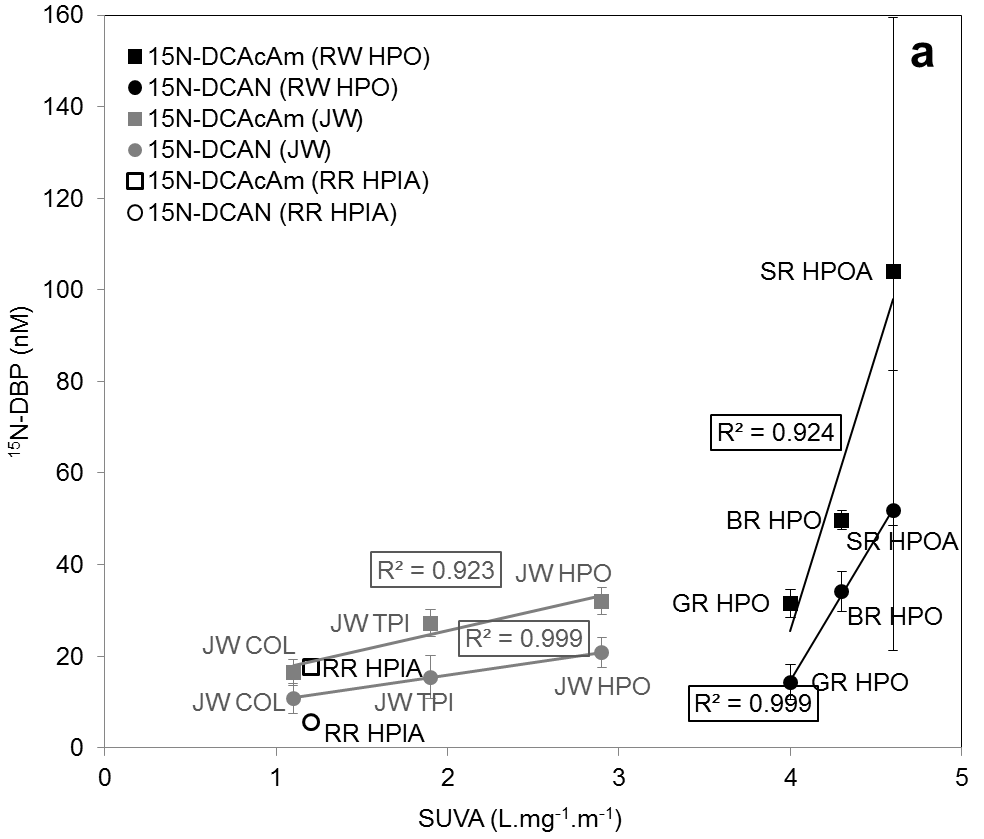


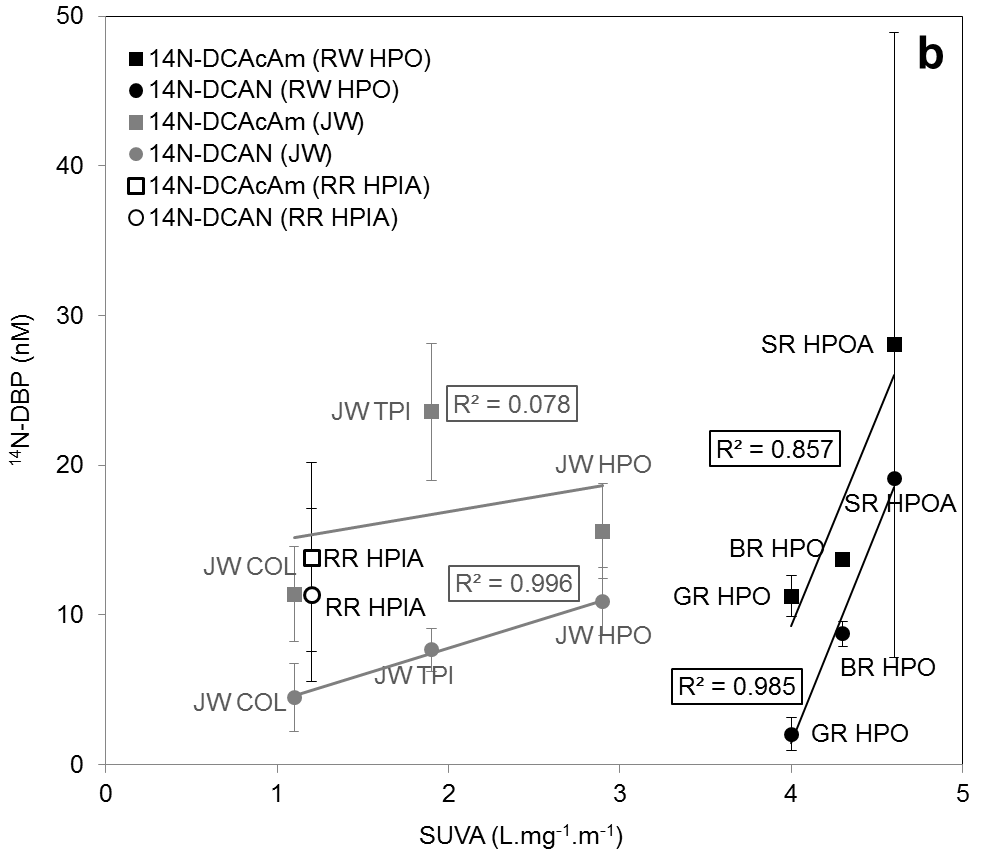


Figure S8. Correlations between a) 15N-DBPs formation potential and b) 14N‑DBPs formation potential and SUVA values of DOM isolates (DOC = 5mg C/L, NH2Cl = 15 mg Cl2/L, reaction time = 72h, pH = 8 with 10 mM phosphate buffer).
